# Supplementary material for: The Effect of Helicobacter pylori Eradication on Lipid Levels: A Meta-Analysis
Source: PubMed Central journal article supplement (PMC7956592; doi:10.3390/jcm10050904), 2021-02-25
Supplement: jcm-10-00904-s001.pdf [file jcm-10-00904-s001.pdf]

| Authors<br>[reference number] | Risk of bias 2 tool assessment              |                                                    |                                  |                                    |                                          |                      |
|-------------------------------|---------------------------------------------|----------------------------------------------------|----------------------------------|------------------------------------|------------------------------------------|----------------------|
|                               | Bias arising from the randomization process | Bias due to deviations from intended interventions | Bias due to missing outcome data | Bias in measurement of the outcome | Bias in selection of the reported result | Overall risk of bias |
| Zhang [30]                    |                                             |                                                    |                                  |                                    |                                          |                      |
| Jamali [35]                   |                                             |                                                    |                                  |                                    |                                          |                      |
| Mirmiran [36]                 |                                             |                                                    |                                  |                                    |                                          |                      |
| Liou [43]                     |                                             |                                                    |                                  |                                    |                                          |                      |

Low risk      Some concerns      High risk

**Supplementary Figure S1.** Quality scores for the reviewed randomized studies

| Authors [ref no.]   | The Newcastle-Ottawa Quality Assessment Scale                  |                                                             |                                                 |                                                                                                 |                                                  |                                |                                                 |                                  | Total<br>Score |
|---------------------|----------------------------------------------------------------|-------------------------------------------------------------|-------------------------------------------------|-------------------------------------------------------------------------------------------------|--------------------------------------------------|--------------------------------|-------------------------------------------------|----------------------------------|----------------|
|                     | Selection                                                      |                                                             | Comparability                                   |                                                                                                 |                                                  | Outcome                        |                                                 | Adequacy of follow-up of cohorts |                |
|                     | Representatives of the exposed cohort/adequate case definition | Selection of the non-exposed cohort/representative of cases | Ascertainment of exposure/selection of controls | Demonstration that outcome of interest was not present at start of study/definition of controls | Comparability on the basis of design or analysis | Assessment of outcome/exposure | Was follow-up long enough for outcomes to occur |                                  |                |
| De Luis [20]        | ★                                                              | -                                                           | ★                                               | -                                                                                               | -                                                | ★                              | -                                               | ★                                | 4              |
| Schweeger [21]      | ★                                                              | ★                                                           | ★                                               | ★                                                                                               | ★                                                | ★                              | -                                               | ★                                | 7              |
| Azuma [22]          | ★                                                              | ★                                                           | ★                                               | -                                                                                               | -                                                | ★                              | ★                                               | ★                                | 6              |
| Elizalde [23]       | ★                                                              | ★                                                           | ★                                               | -                                                                                               | -                                                | ★                              | -                                               | ★                                | 5              |
| Furuta [24]         | ★                                                              | ★                                                           | ★                                               | -                                                                                               | -                                                | ★                              | ★                                               | ★                                | 6              |
| Lu [25]             | ★                                                              | ★                                                           | ★                                               | -                                                                                               | -                                                | ★                              | -                                               | ★                                | 5              |
| Scharnagl [26]      | ★                                                              | ★                                                           | ★                                               | -                                                                                               | -                                                | ★                              | -                                               | ★                                | 5              |
| Kamada [27]         | ★                                                              | -                                                           | ★                                               | -                                                                                               | -                                                | ★                              | ★                                               | ★                                | 5              |
| Kanbay [28]         | ★                                                              | ★                                                           | ★                                               | ★                                                                                               | ★                                                | ★                              | -                                               | ★                                | 7              |
| Park [29]           | ★                                                              | ★                                                           | ★                                               | -                                                                                               | -                                                | ★                              | -                                               | ★                                | 5              |
| Pellicano [31]      | ★                                                              | ★                                                           | ★                                               | -                                                                                               | -                                                | ★                              | ★                                               | ★                                | 6              |
| Gen [32]            | ★                                                              | -                                                           | ★                                               | ★                                                                                               | ★                                                | ★                              | ★                                               | ★                                | 7              |
| Kebapcilar [33]     | ★                                                              | ★                                                           | ★                                               | ★                                                                                               | ★                                                | ★                              | -                                               | -                                | 6              |
| Ando [34]           | ★                                                              | ★                                                           | ★                                               | -                                                                                               | -                                                | ★                              | -                                               | -                                | 4              |
| Nam [37]            | ★                                                              | ★                                                           | ★                                               | -                                                                                               | -                                                | ★                              | -                                               | ★                                | 5              |
| Mokhtare [38]       | ★                                                              | ★                                                           | ★                                               | -                                                                                               | -                                                | ★                              | -                                               | ★                                | 5              |
| Adach [39]          | ★                                                              | ★                                                           | ★                                               | -                                                                                               | -                                                | ★                              | ★                                               | -                                | 5              |
| Iwai [40]           | ★                                                              | ★                                                           | ★                                               | -                                                                                               | -                                                | ★                              | -                                               | ★                                | 5              |
| Cornejo-Pareja [41] | ★                                                              | ★                                                           | ★                                               | -                                                                                               | -                                                | ★                              | -                                               | ★                                | 5              |
| Hung [42]           | ★                                                              | -                                                           | ★                                               | -                                                                                               | -                                                | ★                              | ★                                               | ★                                | 5              |

★ was awarded when the respective information was available.

**Supplementary Figure S2.** Quality scores for the reviewed non-randomized studies

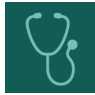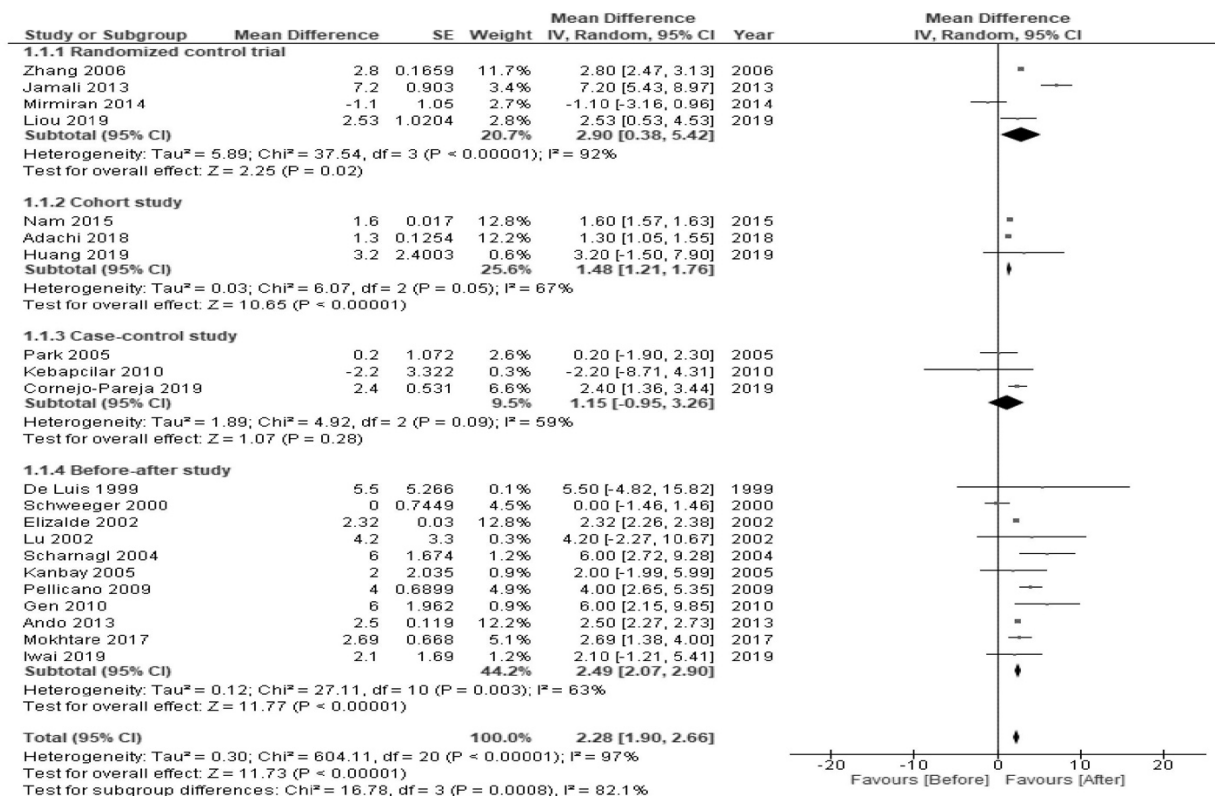

**Supplementary Figure S3.** Forest plot of the mean changes in high-density lipoprotein cholesterol levels before and after *Helicobacter pylori* eradication for each study design

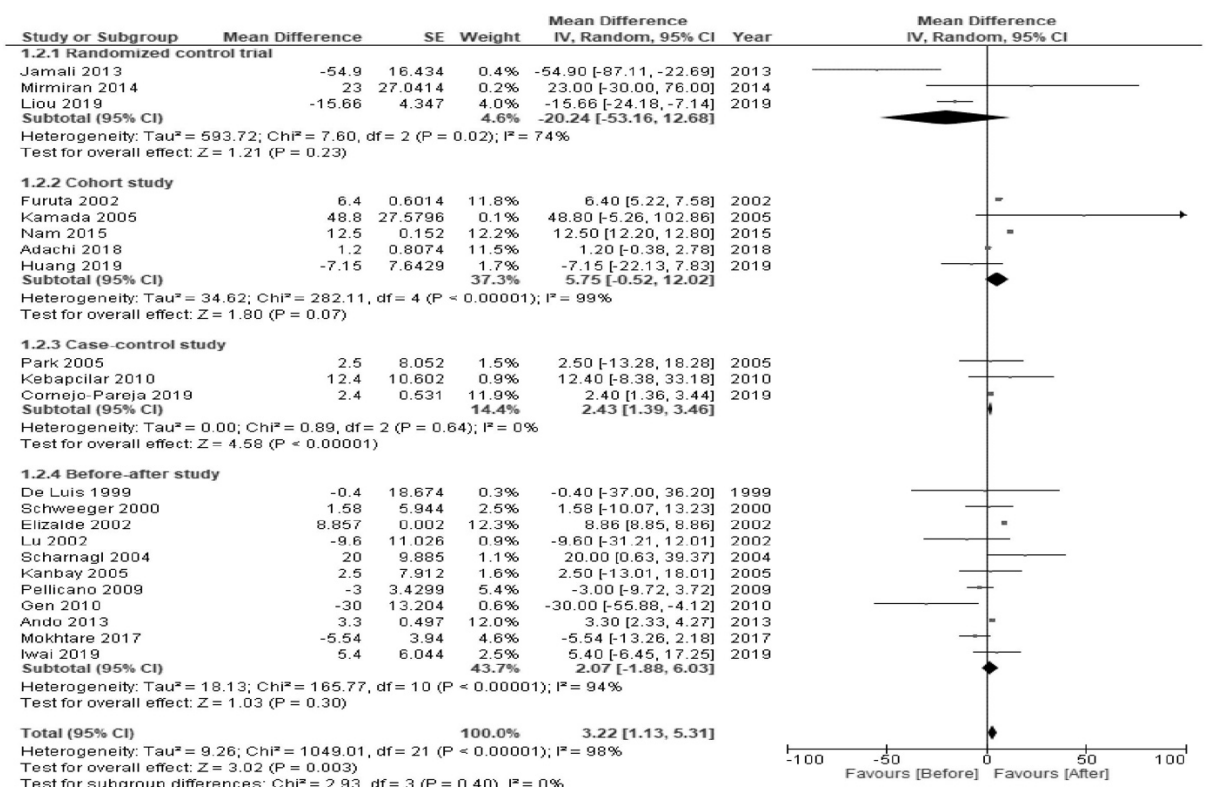

**Supplementary Figure S4.** Forest plot of the mean changes in triglyceride levels before and after *Helicobacter pylori* eradication for each study design

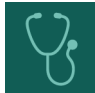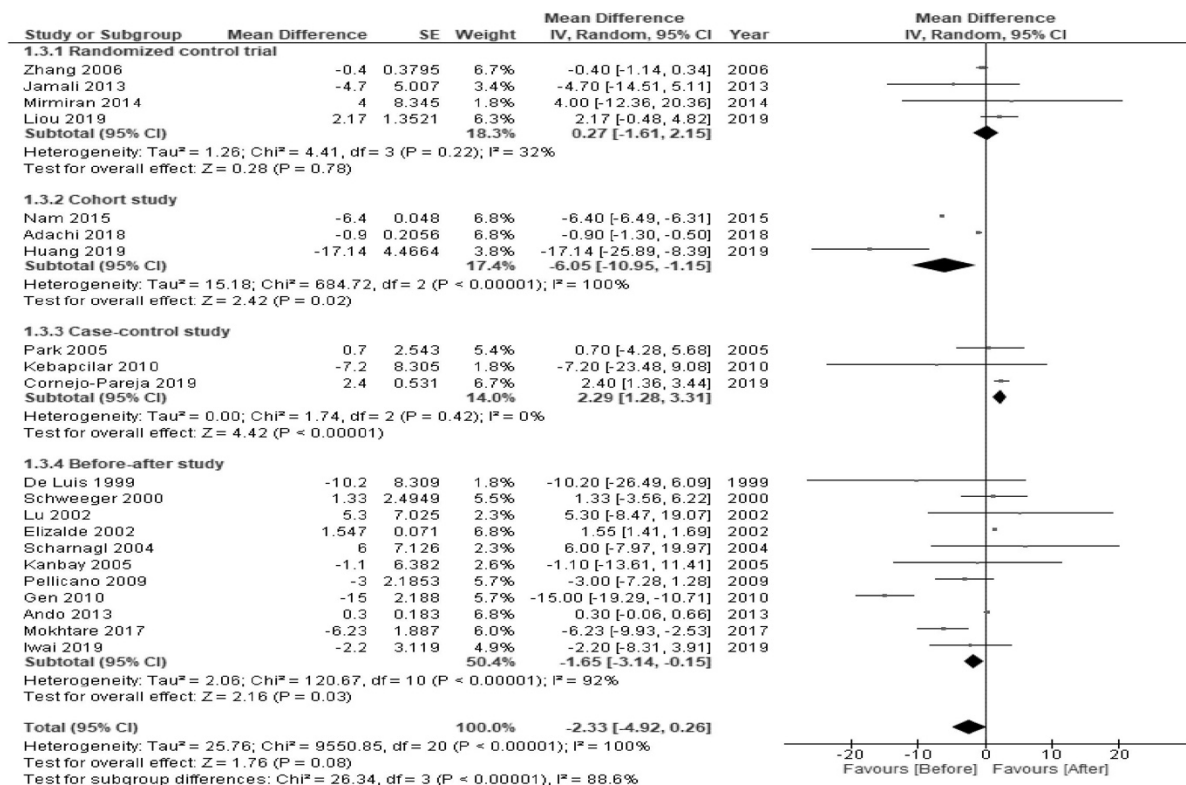

Supplementary Figure S5. Forest plot of the mean changes in low-density lipoprotein cholesterol levels before and after *Helicobacter pylori* eradication for each study design

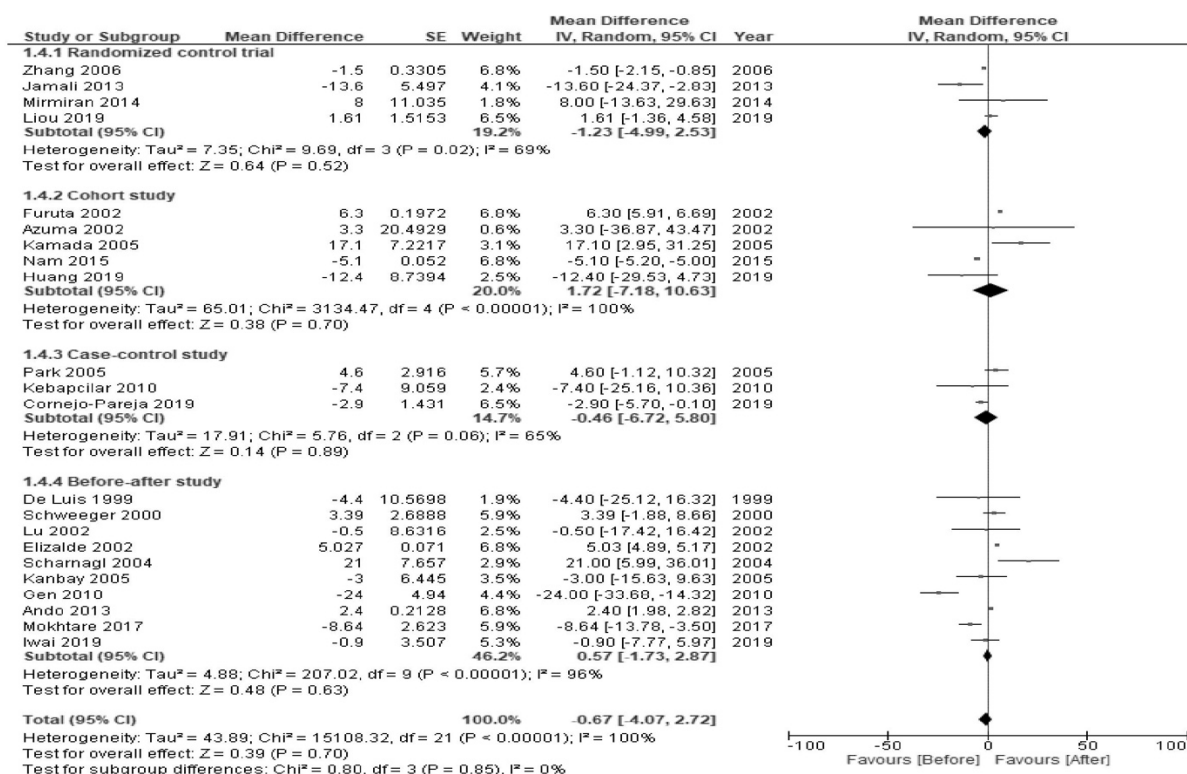

Supplementary Figure S6. Forest plot of the mean changes in total cholesterol levels before and after *Helicobacter pylori* eradication for each study design

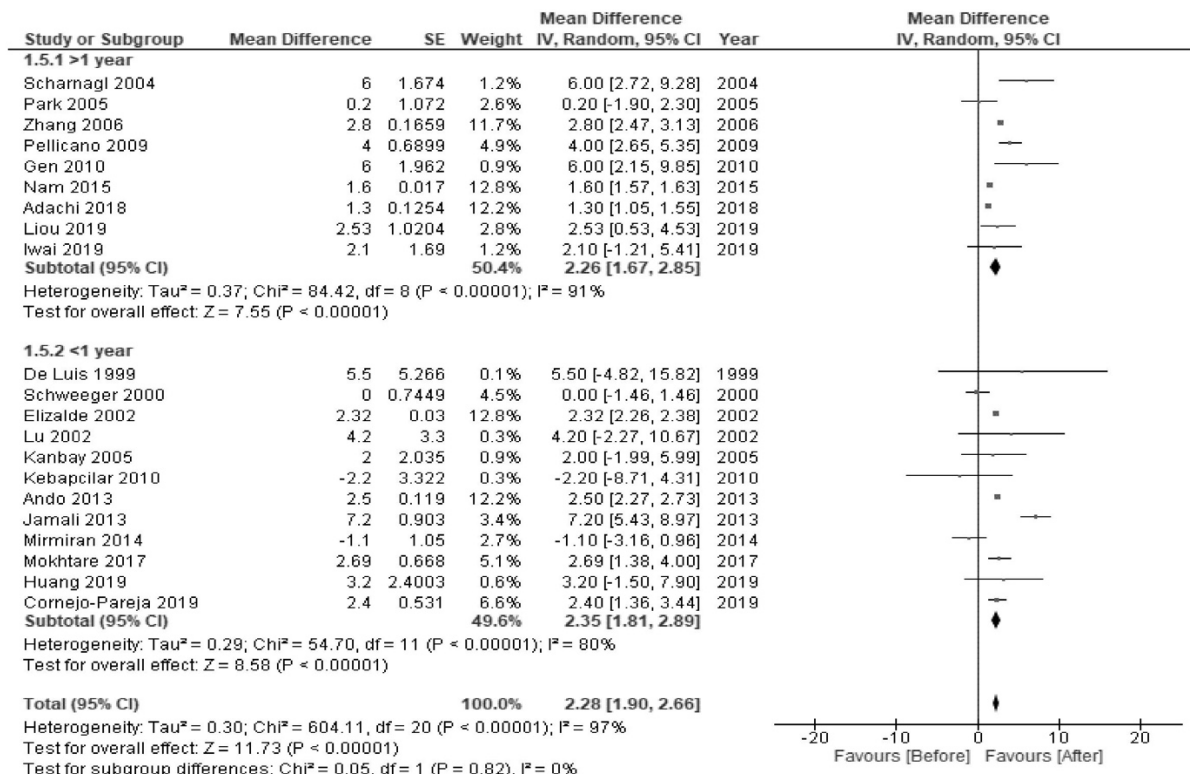

Supplementary Figure S7. Forest plot of the mean changes in high-density lipoprotein cholesterol levels before and after *Helicobacter pylori* eradication during < 1- or ≥ 1-year follow-up

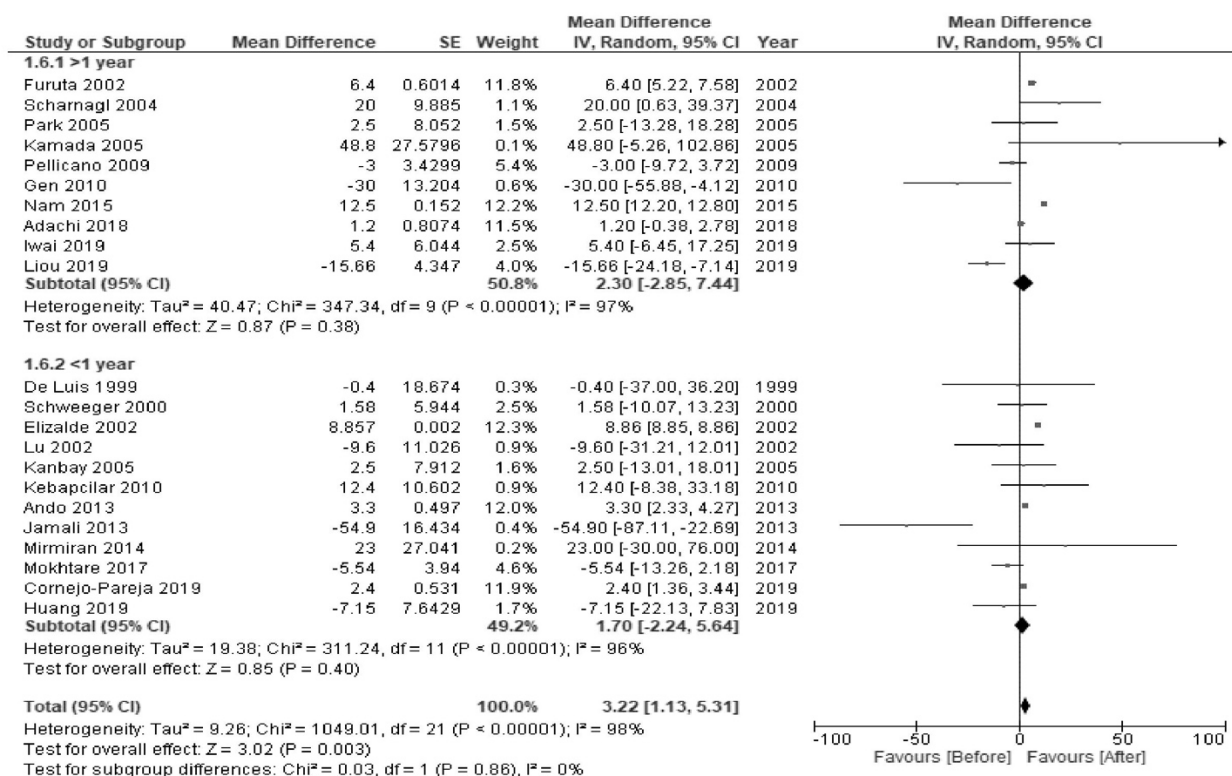

Supplementary Figure S8. Forest plot of the mean changes in triglyceride levels before and after *Helicobacter pylori* eradication during < 1- or ≥ 1-year follow-up

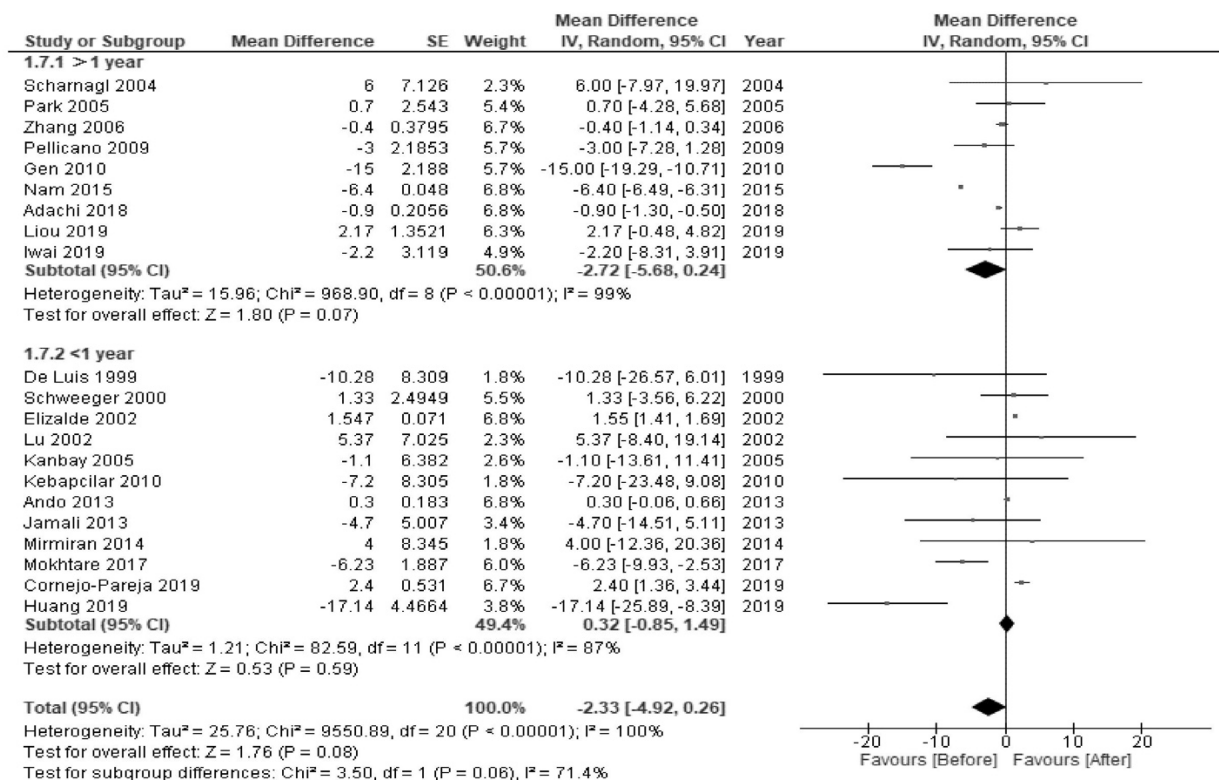

**Supplementary Figure S9.** Forest plot of the mean changes in low-density lipoprotein cholesterol levels before and after *Helicobacter pylori* eradication during <1- or ≥1-year follow-up

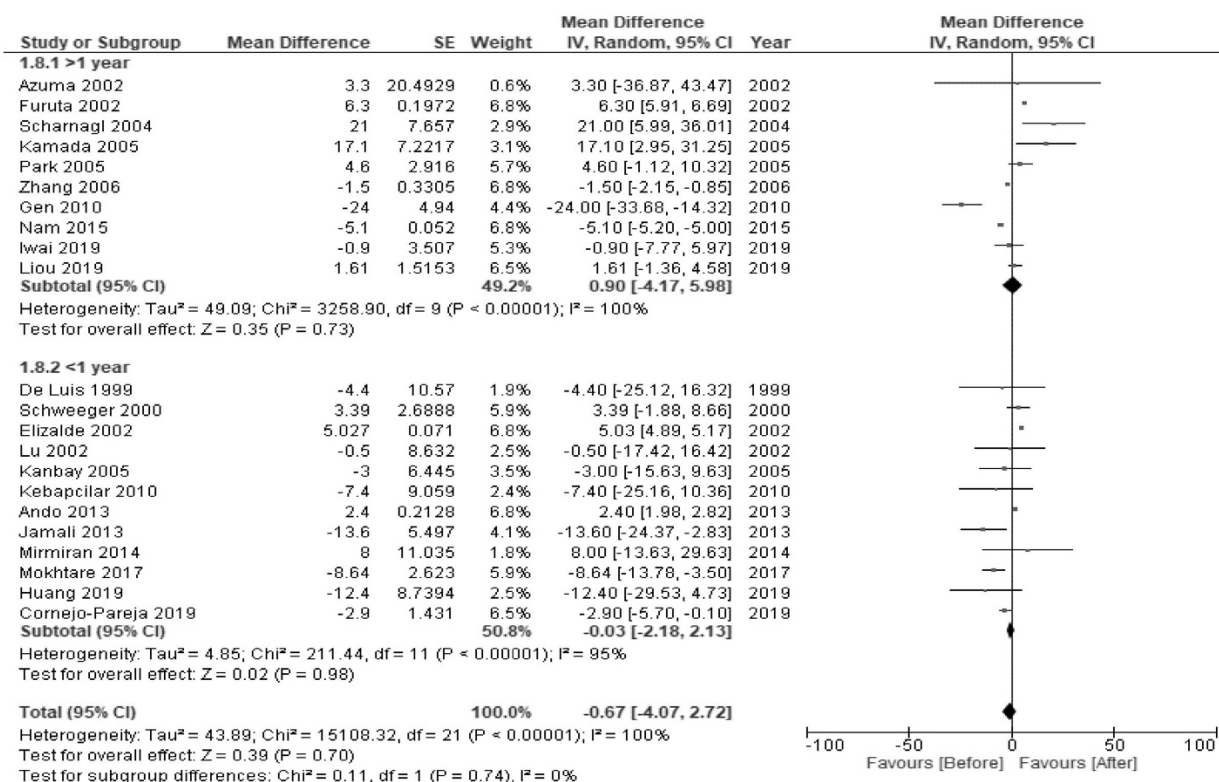

**Supplementary Figure S10.** Forest plot of the mean changes in total cholesterol levels before and after *Helicobacter pylori* eradication during <1- or ≥1-year follow-up

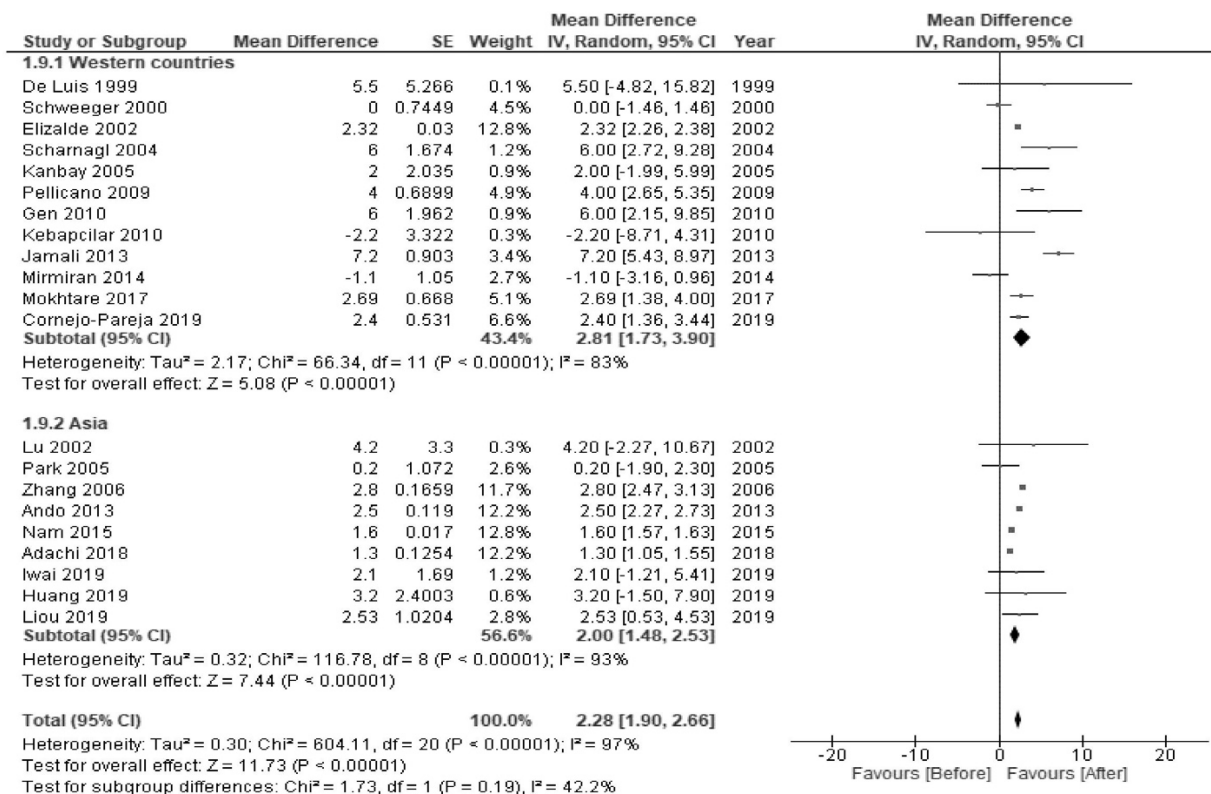

**Supplementary Figure S11.** Forest plot of the mean changes in high-density lipoprotein cholesterol levels before and after *Helicobacter pylori* eradication in Western countries or Asia

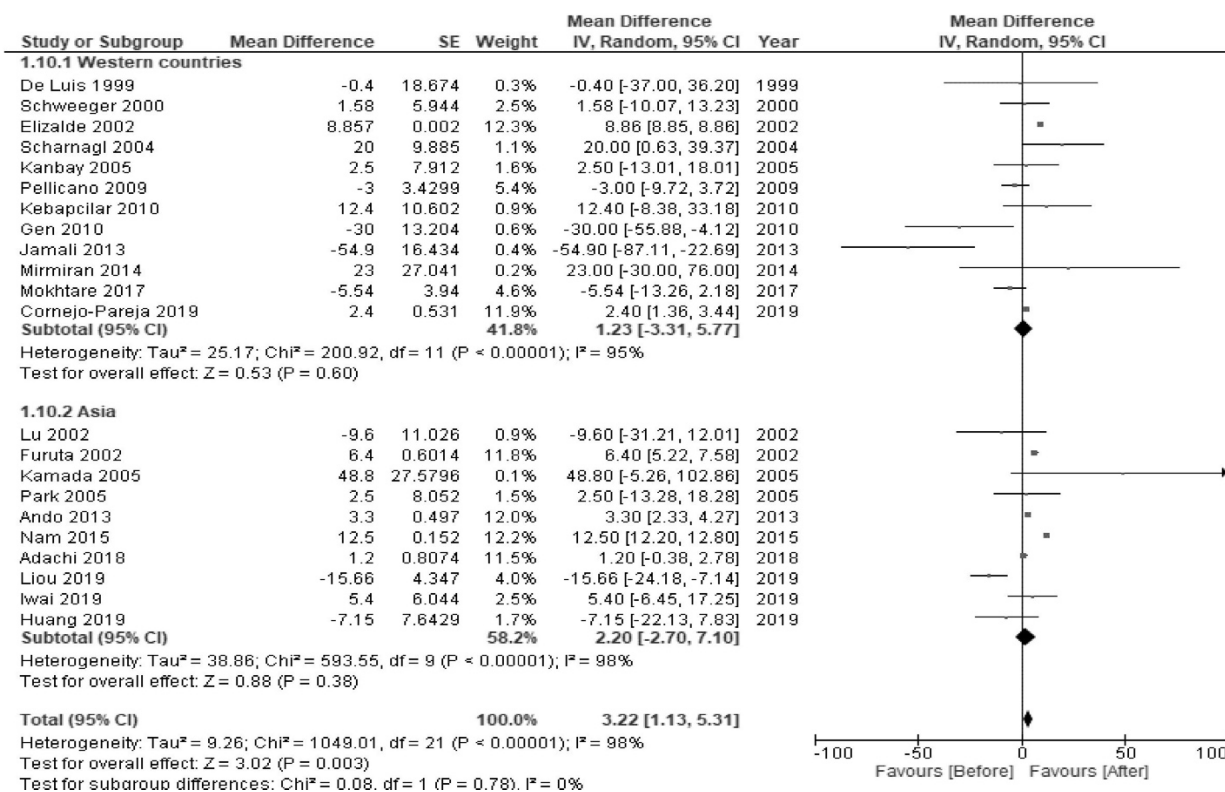

**Supplementary Figure S12.** Forest plot of the mean changes in triglyceride levels before and after *Helicobacter pylori* eradication in Western countries or Asia

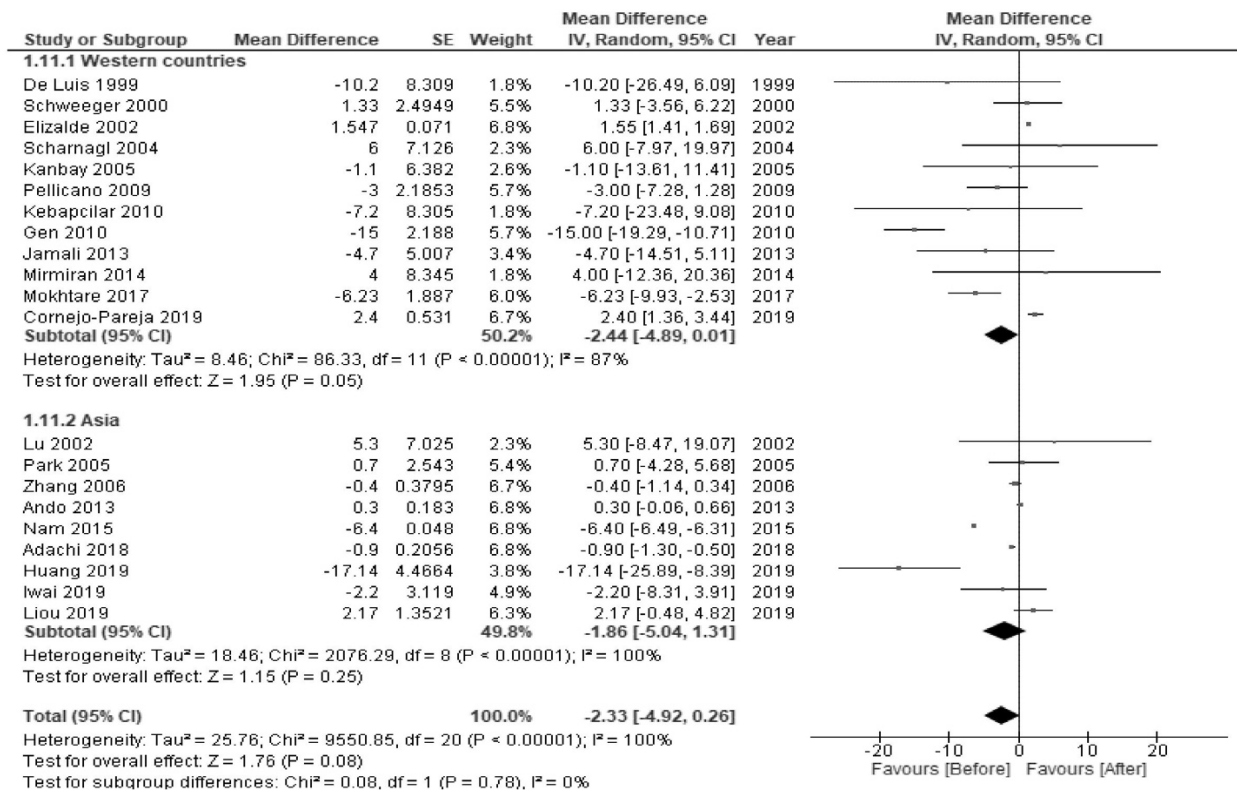

Supplementary Figure S13. Forest plot of the mean changes in low-density lipoprotein cholesterol levels before and after *Helicobacter pylori* eradication in Western countries or Asia

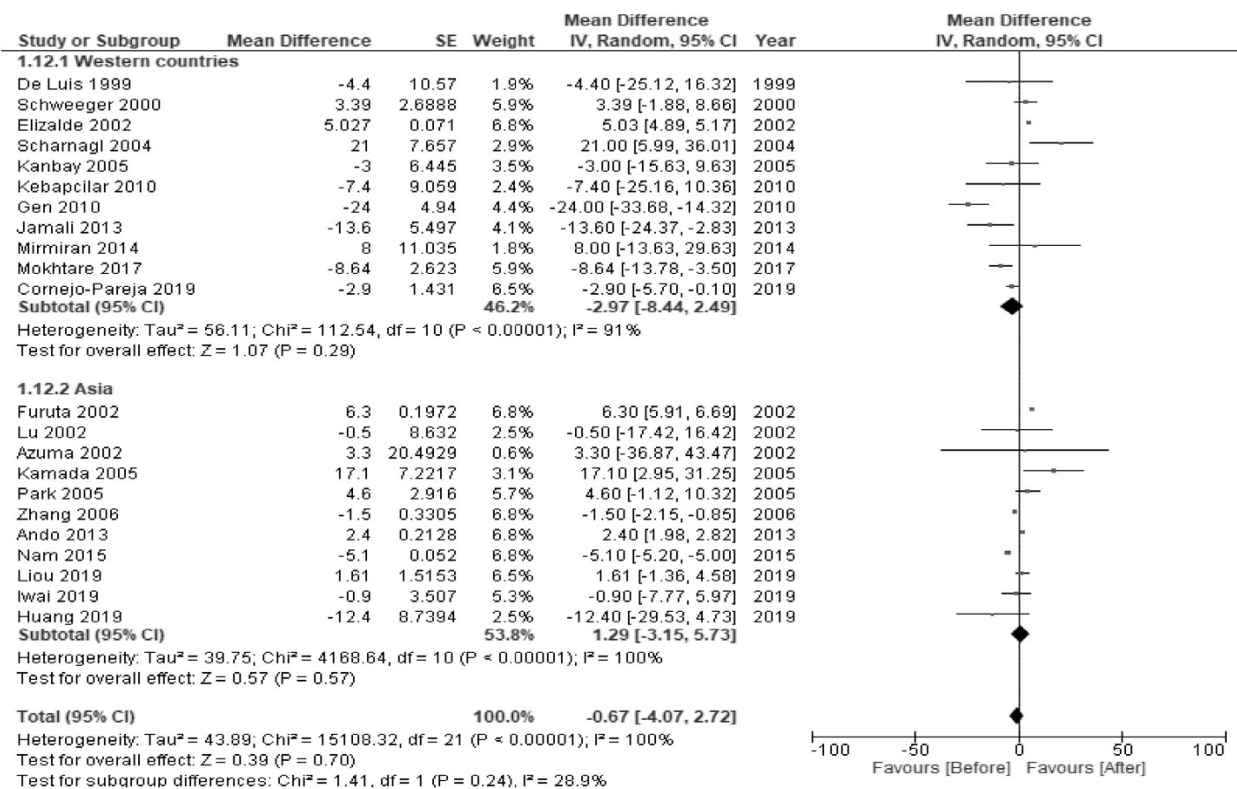

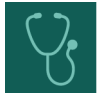

**Supplementary Figure S14.** Forest plot of the mean changes in total cholesterol levels before and after *Helicobacter pylori* eradication excluding studies which did not show the levels of HDL-C, TG, LDL-C and TC before *H. pylori* eradication

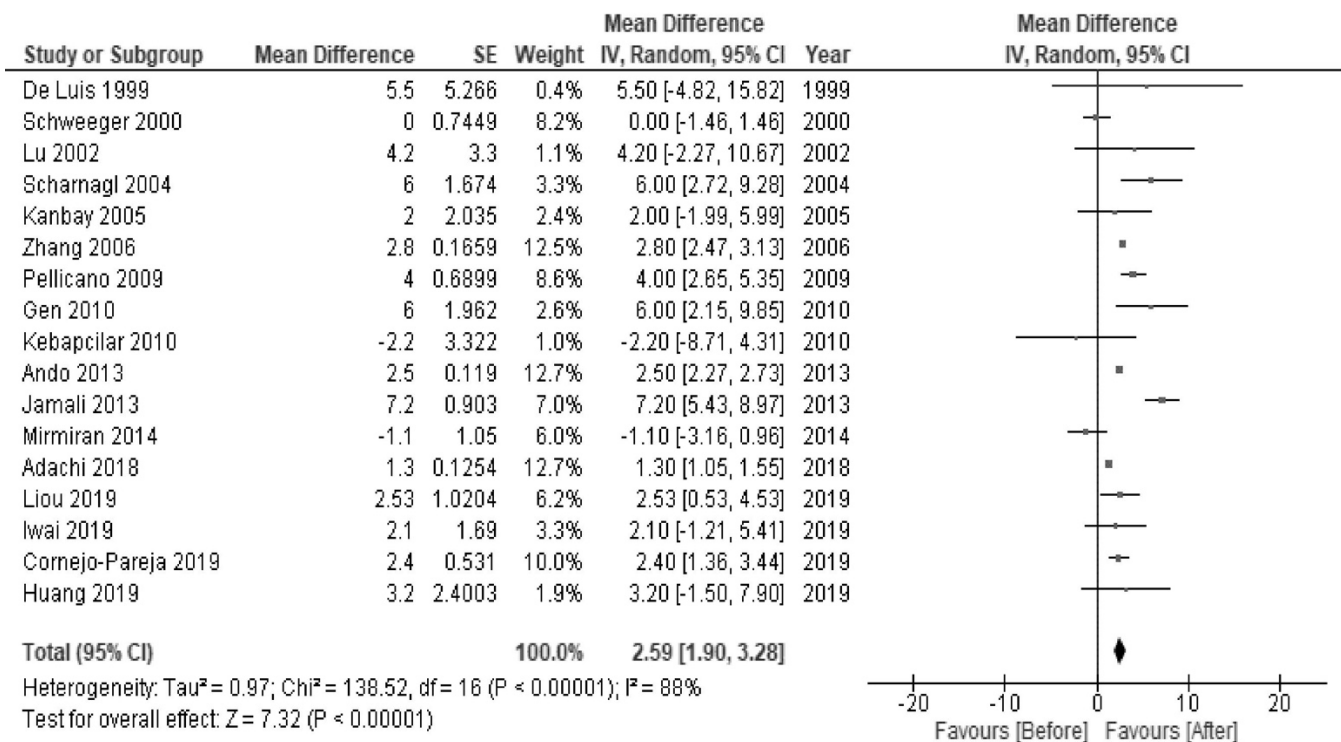

**Supplementary Figure S15.** Forest plot of the mean changes in high-density lipoprotein cholesterol levels before and after *Helicobacter pylori* eradication excluding studies which did not show the levels of high-density lipoprotein cholesterol before *H. pylori* eradication

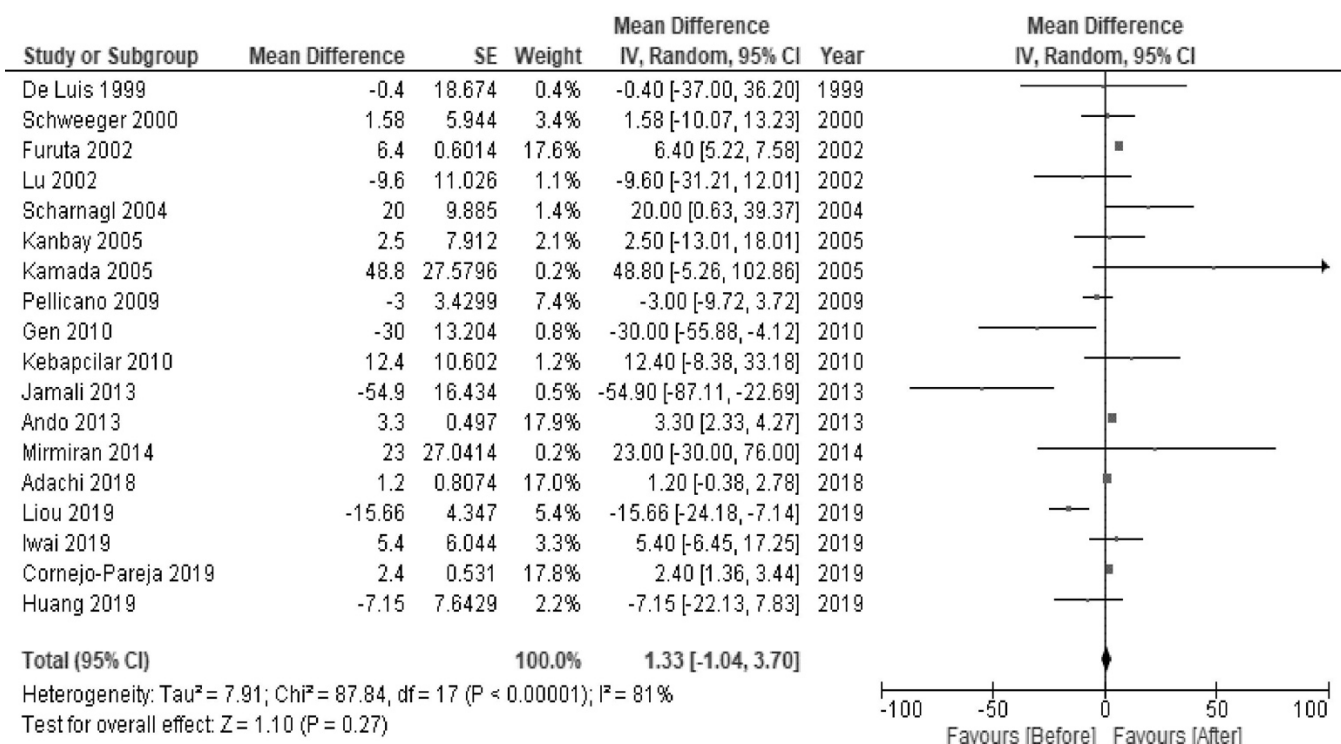





**Supplementary Figure S16.** Forest plot of the mean changes in triglyceride levels before and after *Helicobacter pylori* eradication excluding studies which did not show the levels of triglycerides before *H. pylori* eradication

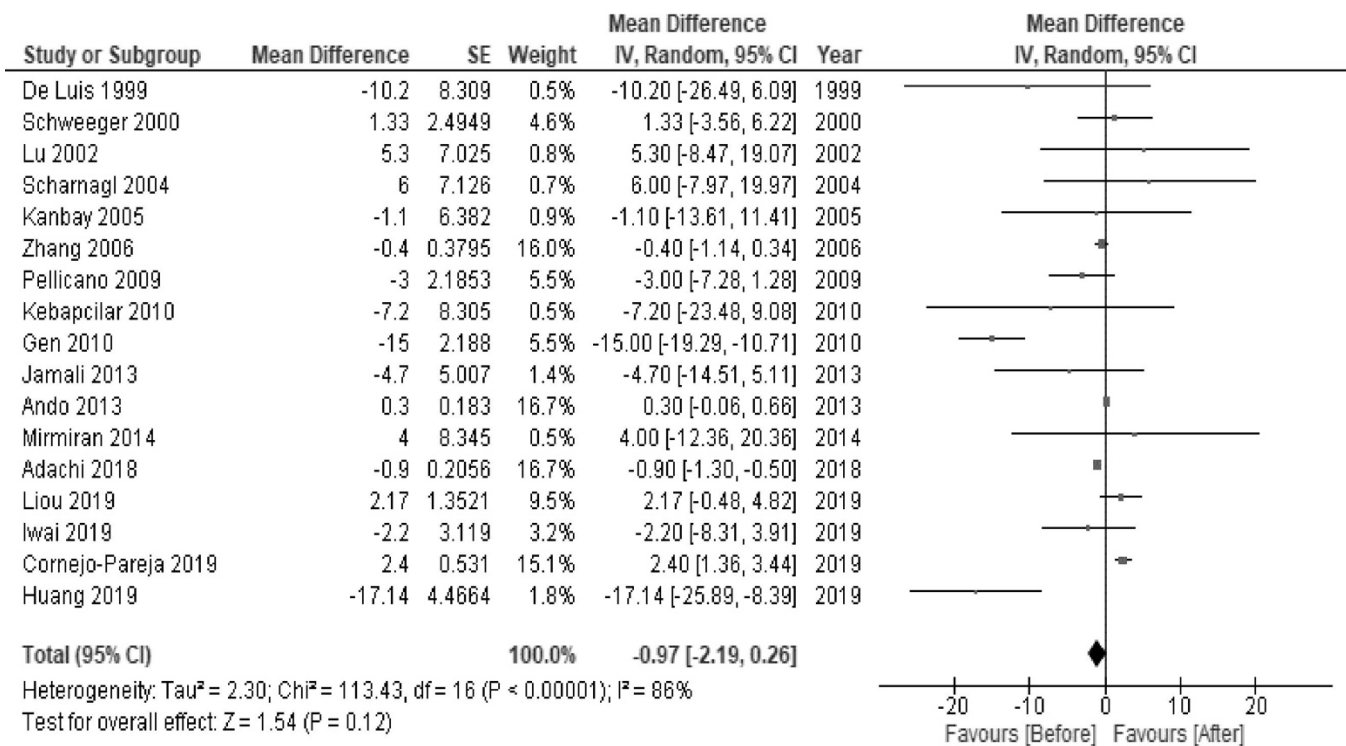

**Supplementary Figure S17.** Forest plot of the mean changes in low-density lipoprotein cholesterol levels before and after *Helicobacter pylori* eradication excluding studies which did not show the levels of low-density lipoprotein cholesterol before *H. pylori* eradication

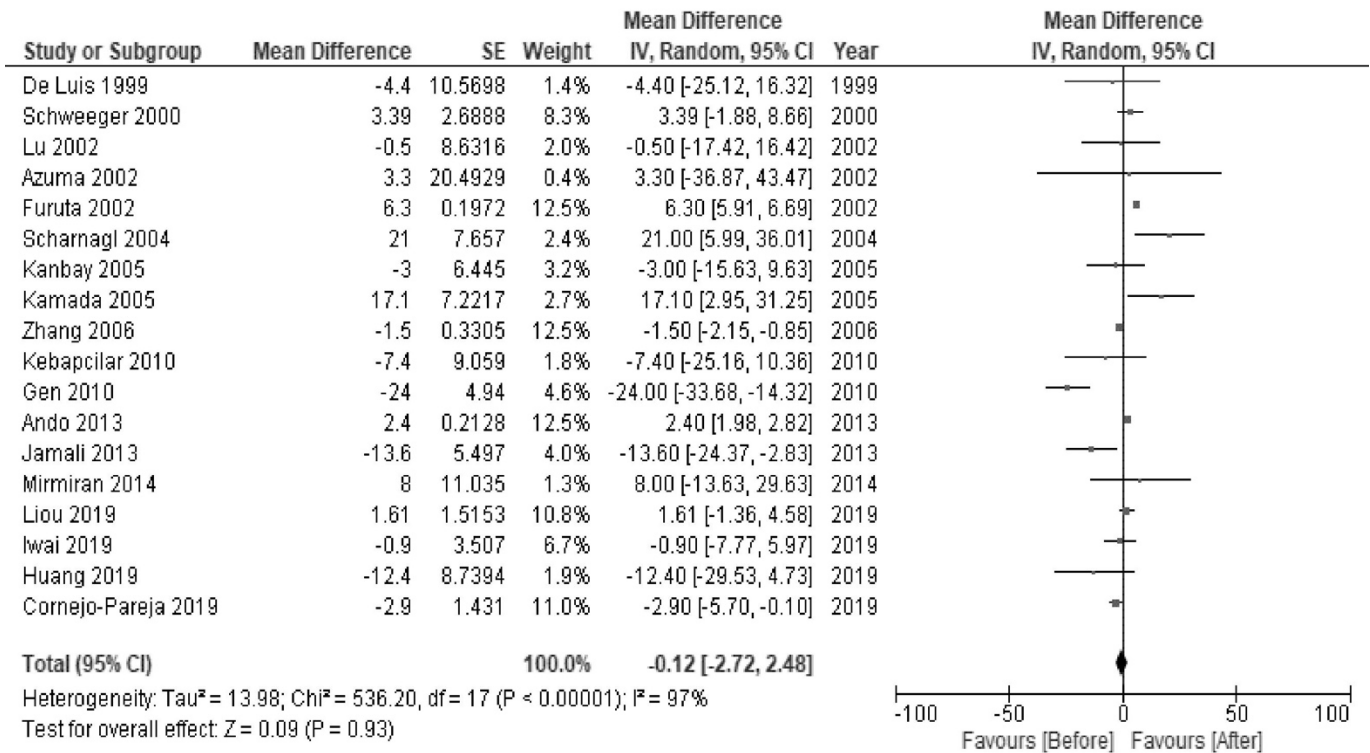

**Supplementary Figure S18.** Forest plot of the mean changes in total cholesterol levels before and after *Helicobacter pylori* eradication excluding studies which did not show the levels of total cholesterol before *H. pylori* eradication
